# Supplementary material
Source: Royal Society of Chemistry journal article supplement (doi:10.1039/d6cy00285d)
Supplement: d6cy00285d1.pdf [file d6cy00285d1.pdf]

Supplementary information

**Synthesis of ethanol via methanol homologation with CO<sub>2</sub> and H<sub>2</sub> using an industrially relevant Ru-Co catalyst**

Longbo Zhang,<sup>†a,b</sup> Jia Guo,<sup>†a,b</sup> Yanyan Wang,<sup>a,b</sup> Ying Wang,<sup>a</sup> Jie Li,<sup>c</sup> Hongxing Wang,<sup>d</sup> Chenglong Yu,<sup>a,b</sup> Yanru Zhang,<sup>a,b</sup> Jun He,<sup>d</sup> Xianyu Meng,<sup>a</sup> Zhuo Zhang,<sup>a,b</sup> Tianbin Wu,<sup>a</sup> Qingli Qian,<sup>\*a,b</sup> Li Tan,<sup>\*e</sup> Buxing Han<sup>\*a,b</sup>

<sup>a</sup>Beijing National Laboratory for Molecular Sciences, CAS Laboratory of Colloid and Interface and Thermodynamics, CAS Research/Education Center for Excellence in Molecular Sciences, Center for Carbon Neutral Chemistry, Institute of Chemistry, Chinese Academy of Sciences, Beijing 100190, China.

<sup>b</sup>School of Chemical Science, University of Chinese Academy of Sciences, Beijing 100049, China.

<sup>c</sup>Department of Chemical Engineering, The University of Manchester, Manchester M13 9PL, UK.

<sup>d</sup>College of Chemical Engineering and Materials Science, Tianjin University of Science and Technology, Tianjin 300457, China.

<sup>e</sup>State Key Laboratory of Green and Efficient Development of Phosphorus Resources, College of Chemistry, Fuzhou University, Fuzhou 350108, China.

\*Corresponding author. Email: qianql@iccas.ac.cn; tan@fzu.edu.cn; hanbx@iccas.ac.cn

<sup>†</sup>These authors contributed equally.

**Table S1** Prices of Medications Used in the Experiment.

| Entry | Catalyst precursor                        | Brand    | Price (yuan per gram) |
|-------|-------------------------------------------|----------|-----------------------|
| 1     | $\text{RuCl}_3$                           | Innochem | 133                   |
| 2     | $\text{CoCl}_2$                           | Acros    | 128                   |
| 3     | $\text{RuCl}_3 \cdot 3\text{H}_2\text{O}$ | Innochem | 85                    |
| 4     | $\text{CoCl}_2 \cdot 6\text{H}_2\text{O}$ | Innochem | 7                     |
| 5     | $[\text{Ru}(\text{CO})_3\text{Cl}_2]_2$   | Apinno   | 1629                  |
| 6     | $\text{Co}_4(\text{CO})_{12}$             | Alfa     | 612                   |
| 7     | $\text{RuBr}_3$                           | Macklin  | 2700                  |
| 8     | $\text{RuI}_3$                            | Alfa     | 1369                  |
| 9     | $\text{CoBr}_2$                           | Alfa     | 17.8                  |
| 10    | $\text{CoI}_2$                            | Innochem | 33                    |
| 11    | $\text{Ru}_3(\text{CO})_{12}$             | Innochem | 277                   |

Note: The above price information was collected from <https://www.inno-chem.com.cn/> in August 2024.

**Table S2** The amounts of other byproducts formed in Table 1.

| Entry | Ru/Co<br>( $\mu\text{mol}$ ) | Methanol<br>substrate<br>(mmol) | Ethanol<br>selectivity<br>(%) | Ethanol<br>produced<br>(mmol) | CO<br>produced<br>(mmol) | CH <sub>4</sub><br>produced<br>(mmol) |
|-------|------------------------------|---------------------------------|-------------------------------|-------------------------------|--------------------------|---------------------------------------|
| 1     | 5/240                        | 6.3                             | 62.4                          | 1.43                          | 0.67                     | 0.86                                  |
| 2     | 5/240                        | 12.5                            | 61.8                          | 2.10                          | 0.71                     | 1.30                                  |
| 3     | 10/240                       | 12.5                            | 58.5                          | 2.27                          | 0.61                     | 1.61                                  |
| 4     | 10/360                       | 12.5                            | 64.9                          | 2.58                          | 0.30                     | 1.40                                  |
| 5     | 10/480                       | 12.5                            | 55.4                          | 2.47                          | 0.50                     | 1.99                                  |
| 6     | 15/720                       | 18.8                            | 37.6                          | 1.50                          | 0.44                     | 2.49                                  |

Reaction conditions: a certain amount of  $\text{RuCl}_3 \cdot 3\text{H}_2\text{O}$  and  $\text{CoCl}_2 \cdot 6\text{H}_2\text{O}$ , 3 mmol LiI, 2 mL NEP, (activation condition: 6 MPa CO, 200 °C, 12 h), a certain amount of methanol, 2 MPa CO<sub>2</sub> and 6 MPa H<sub>2</sub>, 170 °C, 15 h of reaction.

**Table S3** The amounts of other byproducts formed in Table 2.

| Entry | Catalyst precursors | Methanol substrate (mmol) | Ethanol selectivity (%) | Ethanol produced (mmol) | CO produced (mmol) | CH <sub>4</sub> produced (mmol) |
|-------|---------------------|---------------------------|-------------------------|-------------------------|--------------------|---------------------------------|
| 1*    | Ru/LiI              | 0                         | -                       | 0                       | 1.35               | 0                               |
| 2     | Co/LiI              | 12.5                      | 12.8                    | 0.14                    | 0                  | 0.98                            |
| 3     | Ru/Co/LiI           | 12.5                      | 47.8                    | 1.64                    | 0                  | 1.79                            |
| 4     | Ru/Co/LiI           | 12.5                      | 64.9                    | 2.58                    | 0.30               | 1.40                            |
| 5     | Ru/Co               | 12.5                      | -                       | 0                       | 0.60               | 0.12                            |
| 6*    | Ru/Co/LiI           | 0                         | -                       | 0                       | 1.11               | 0                               |

Reaction conditions: 10  $\mu\text{mol}$   $\text{RuCl}_3 \cdot 3\text{H}_2\text{O}$  and/or 360  $\mu\text{mol}$   $\text{CoCl}_2 \cdot 6\text{H}_2\text{O}$ , and/or 3 mmol LiI, 2 mL NEP, (activation condition: 6 MPa CO, 200 °C, 12 h), after catalyst activation the reaction was conducted at the following conditions: 12.5 mmol methanol if used, 2 MPa CO<sub>2</sub> or 0.5 MPa CO, and 6 MPa H<sub>2</sub>, 170 °C, 15 h of reaction. \* CO was detected, while no methane was observed after the reaction.

**Table S4** Effect of different dosages of RuCl<sub>3</sub>·3H<sub>2</sub>O/CoCl<sub>2</sub>·6H<sub>2</sub>O on ethanol synthesis from methanol, CO<sub>2</sub> and H<sub>2</sub>.

| Entry | Ru/Co<br>( $\mu\text{mol}$ ) | Methanol<br>conversion<br>(%) | Ethanol<br>Selectivity<br>(%) | STY of ethanol<br>( $\text{g}\cdot\text{L}^{-1}\cdot\text{h}^{-1}$ ) |
|-------|------------------------------|-------------------------------|-------------------------------|----------------------------------------------------------------------|
| 1     | 5/240                        | 42.4                          | 48.8                          | 2.0                                                                  |
| 2     | 10/240                       | 58.5                          | 38.6                          | 1.9                                                                  |
| 3     | 20/240                       | 63.5                          | 34.8                          | 1.1                                                                  |
| 4     | 30/240                       | 76.9                          | 21.5                          | 1.1                                                                  |
| 5     | 40/240                       | 76.5                          | 20.0                          | 1.1                                                                  |
| 6     | 50/240                       | 85.4                          | 13.2                          | 1.1                                                                  |
| 7     | 40/180                       | 84.4                          | 13.5                          | 1.0                                                                  |
| 8     | 40/300                       | 78.1                          | 21.6                          | 1.6                                                                  |
| 9     | 40/450                       | 77.2                          | 25.8                          | 1.9                                                                  |
| 10    | 40/600                       | 78.3                          | 25.1                          | 1.9                                                                  |

Reaction conditions: a certain amount of RuCl<sub>3</sub>·3H<sub>2</sub>O and CoCl<sub>2</sub>·6H<sub>2</sub>O, 3 mmol LiI, 2 mL NEP, (activation condition: 6 MPa CO, 200 °C, 12 h), 12.5 mmol methanol, 2 MPa CO<sub>2</sub> and 6 MPa H<sub>2</sub>, 170 °C, 15 h of reaction.

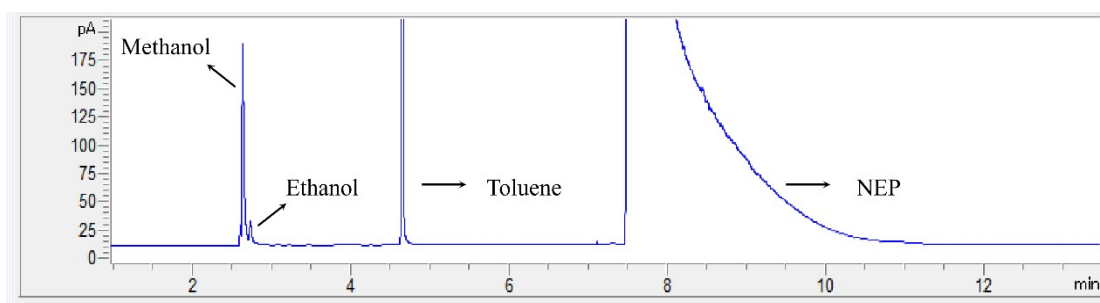

**Fig. S1** GC spectrum of reaction solution obtained without CO activation of the Ru/Co precursors.

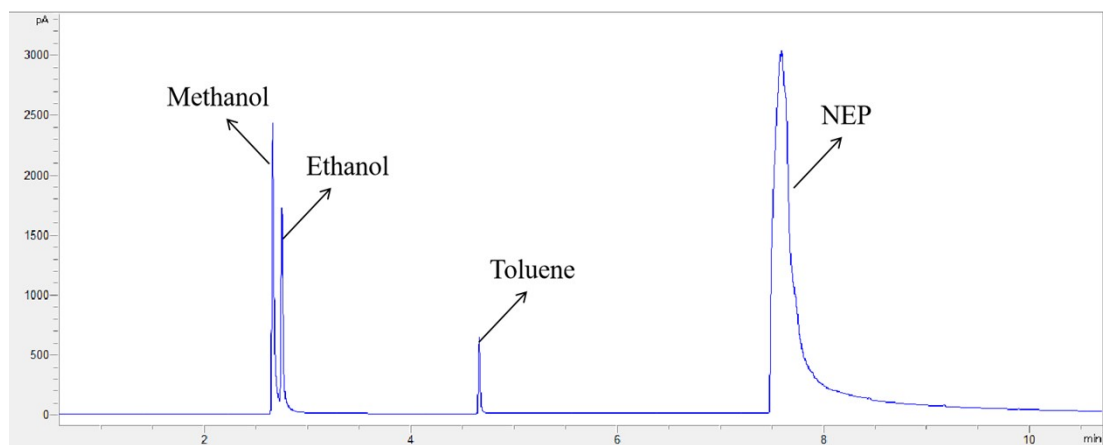

**Fig. S2** GC spectrum of reaction solution obtained under optimal conditions.

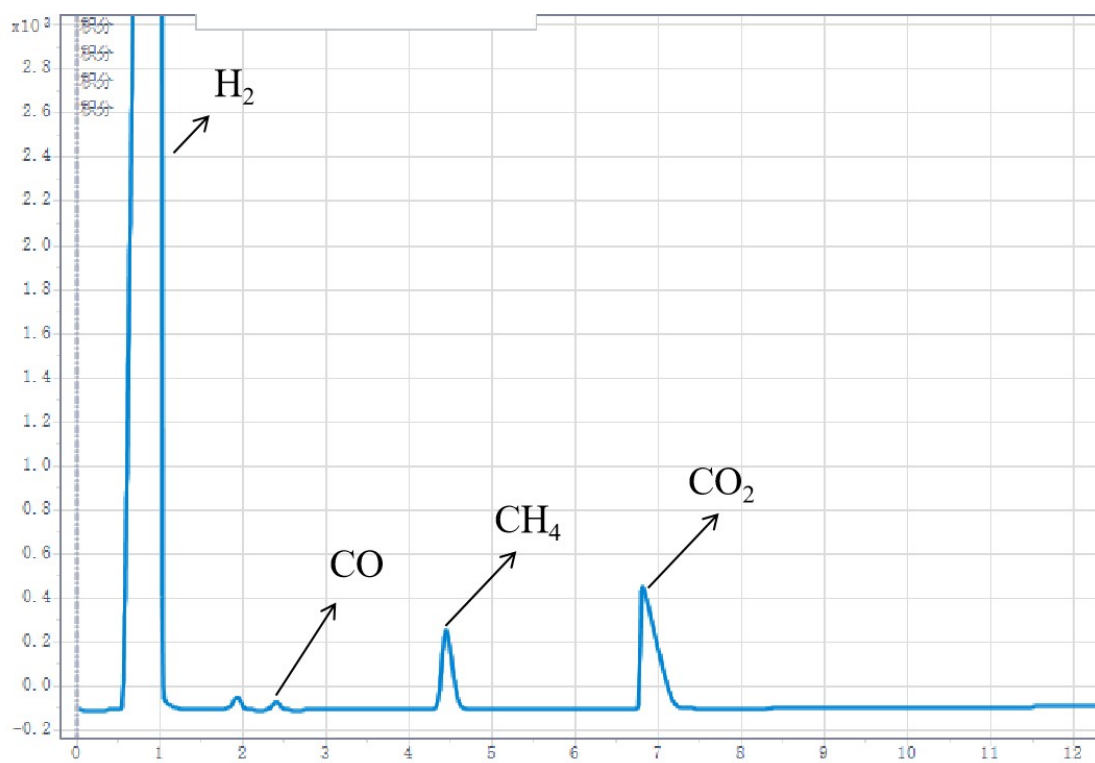

**Fig. S3** GC spectrum of gas products after the reaction under optimal conditions.

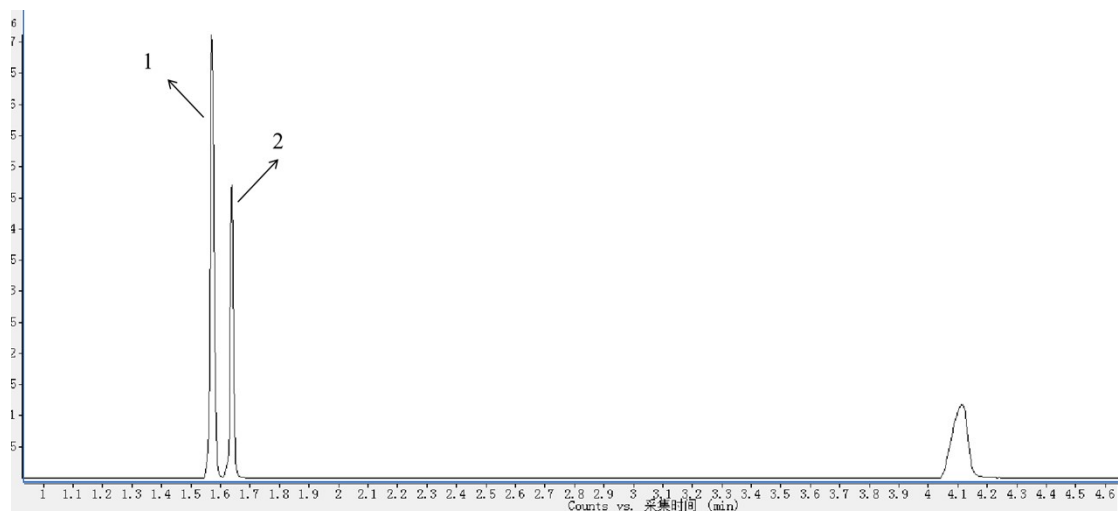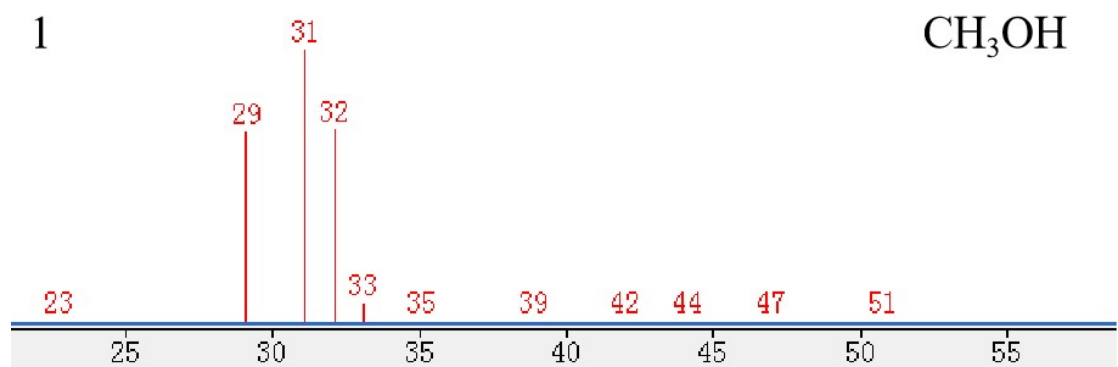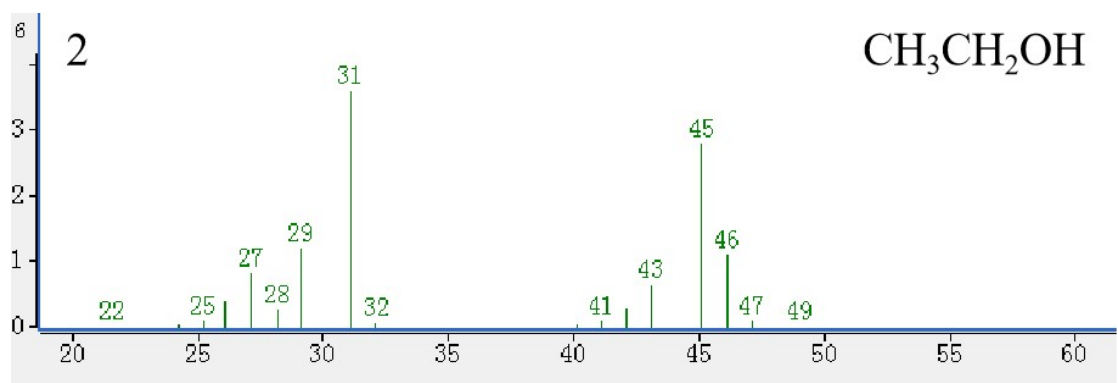

**Fig. S4** GC-MS spectra of the reaction solution obtained at the optimized condition.

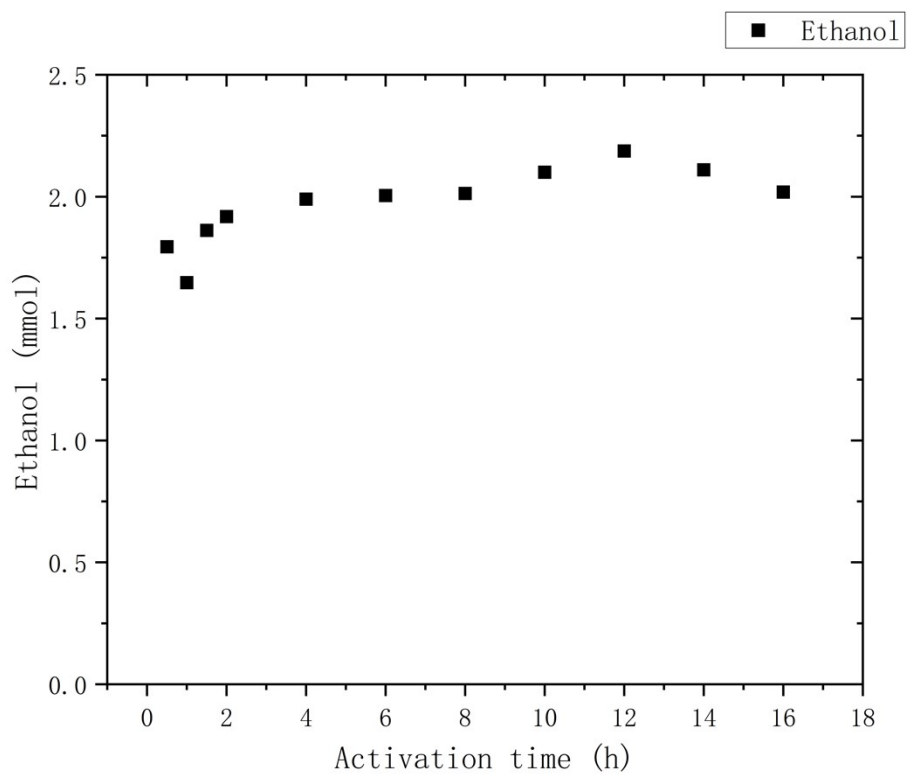

**Fig. S5** The reaction results using the catalyst precursors activated for different time.

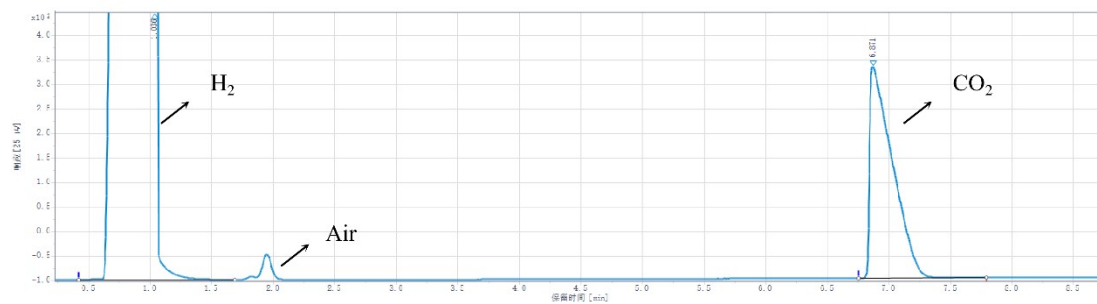

**Fig. S6** GC spectrum of gas products after the reaction of CO<sub>2</sub> and H<sub>2</sub> catalyzed by the Co catalyst and LiI promoter.

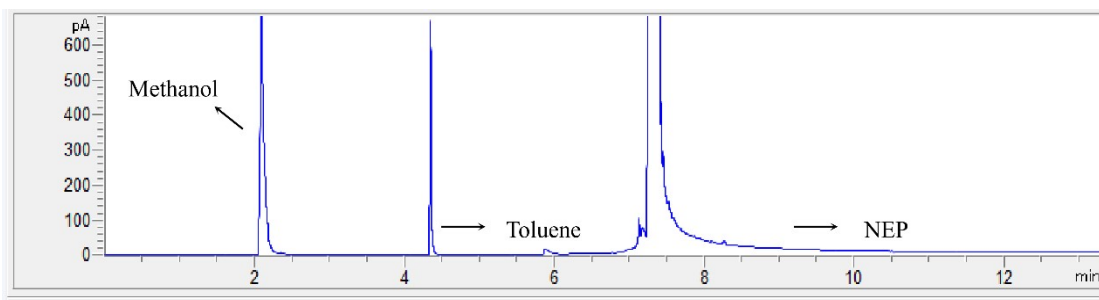

**Fig. S7** GC spectrum of the solution after the reaction of methanol, CO<sub>2</sub> and H<sub>2</sub> catalyzed by the Co catalyst and LiI promoter.

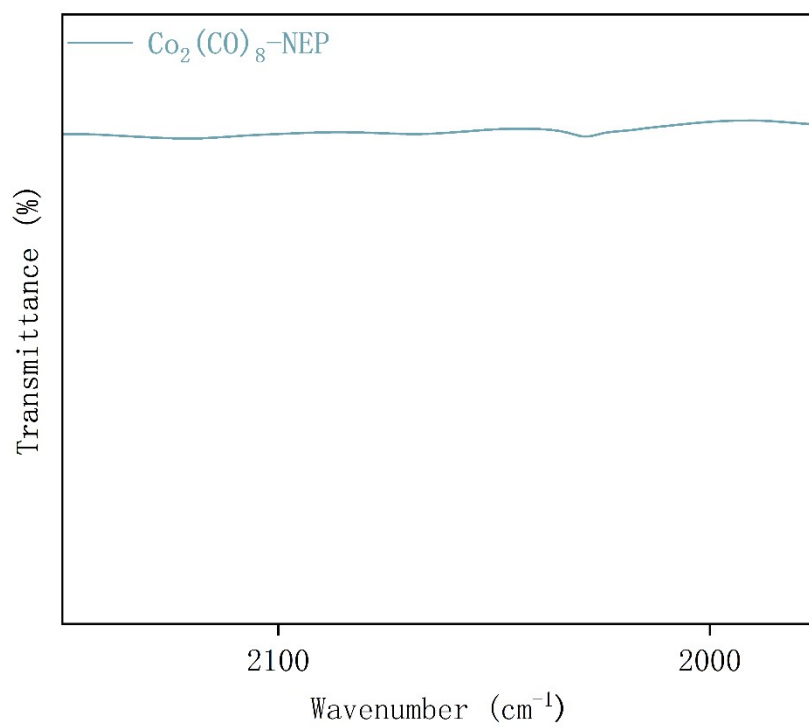

**Fig. S8** FTIR image of  $\text{Co}_2(\text{CO})_8$ -NEP standard solution.

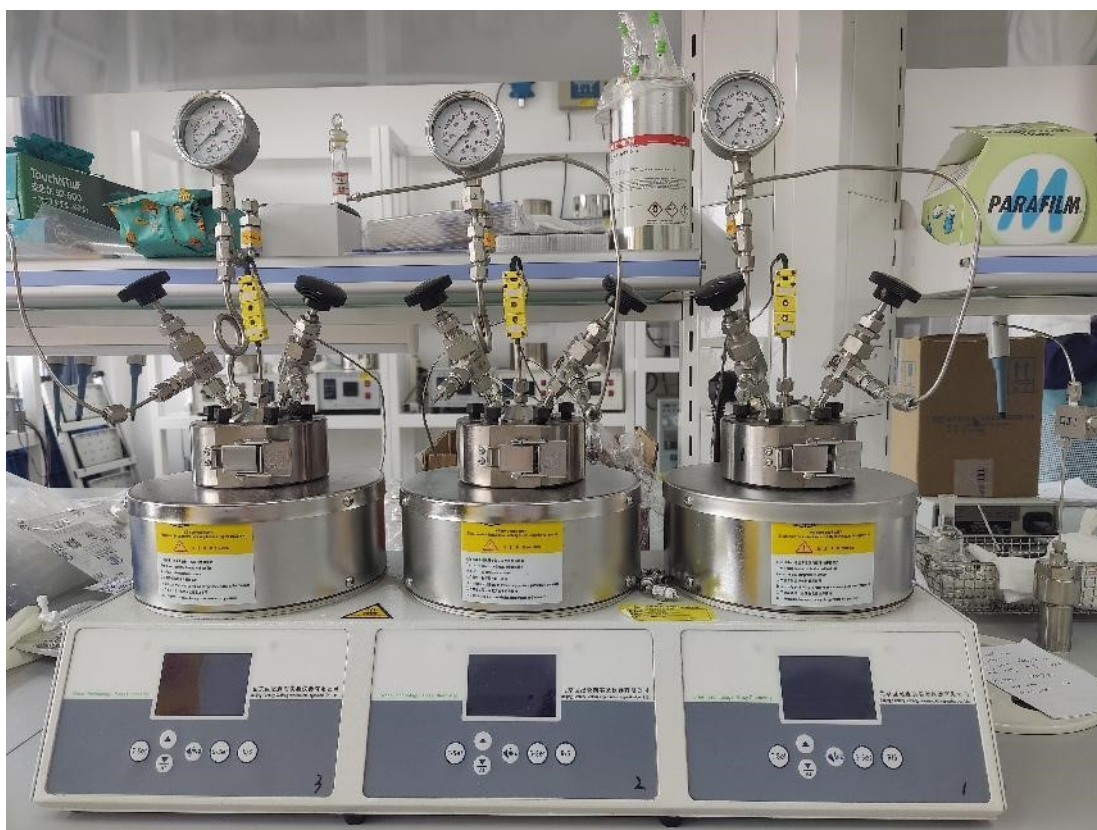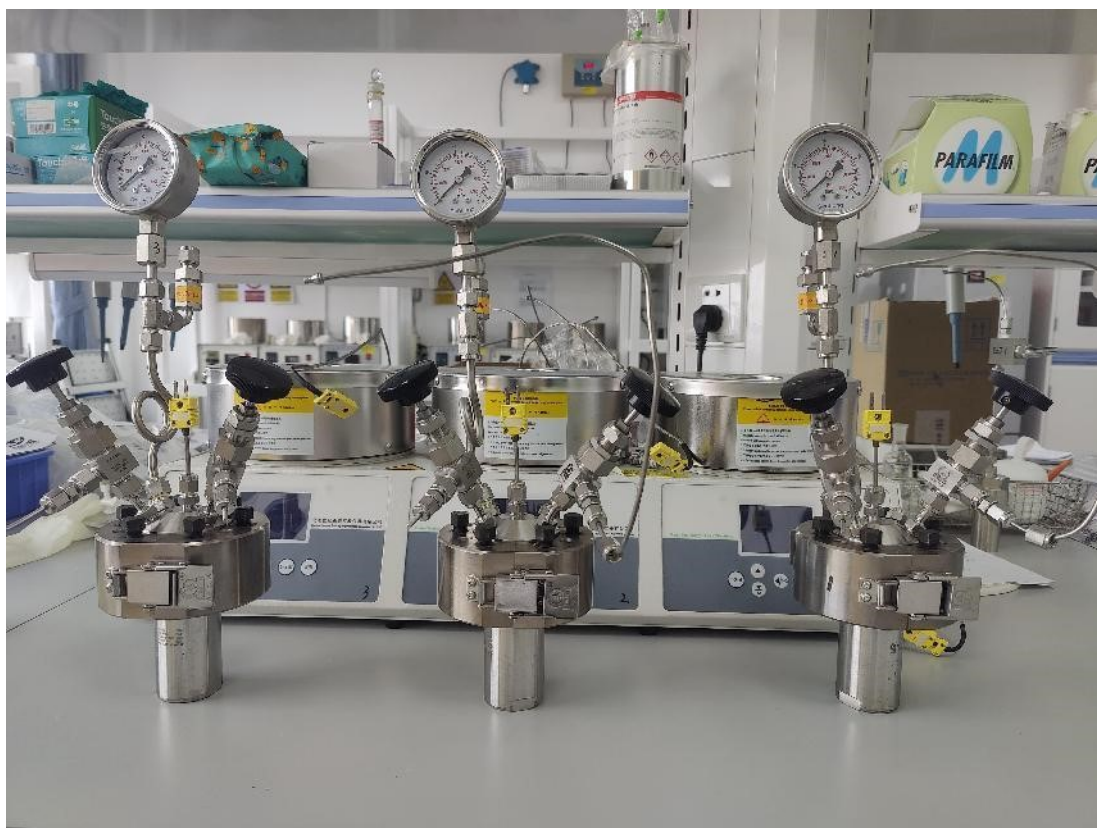

Fig. S9 The batch reactors with a capacity of 25 mL.

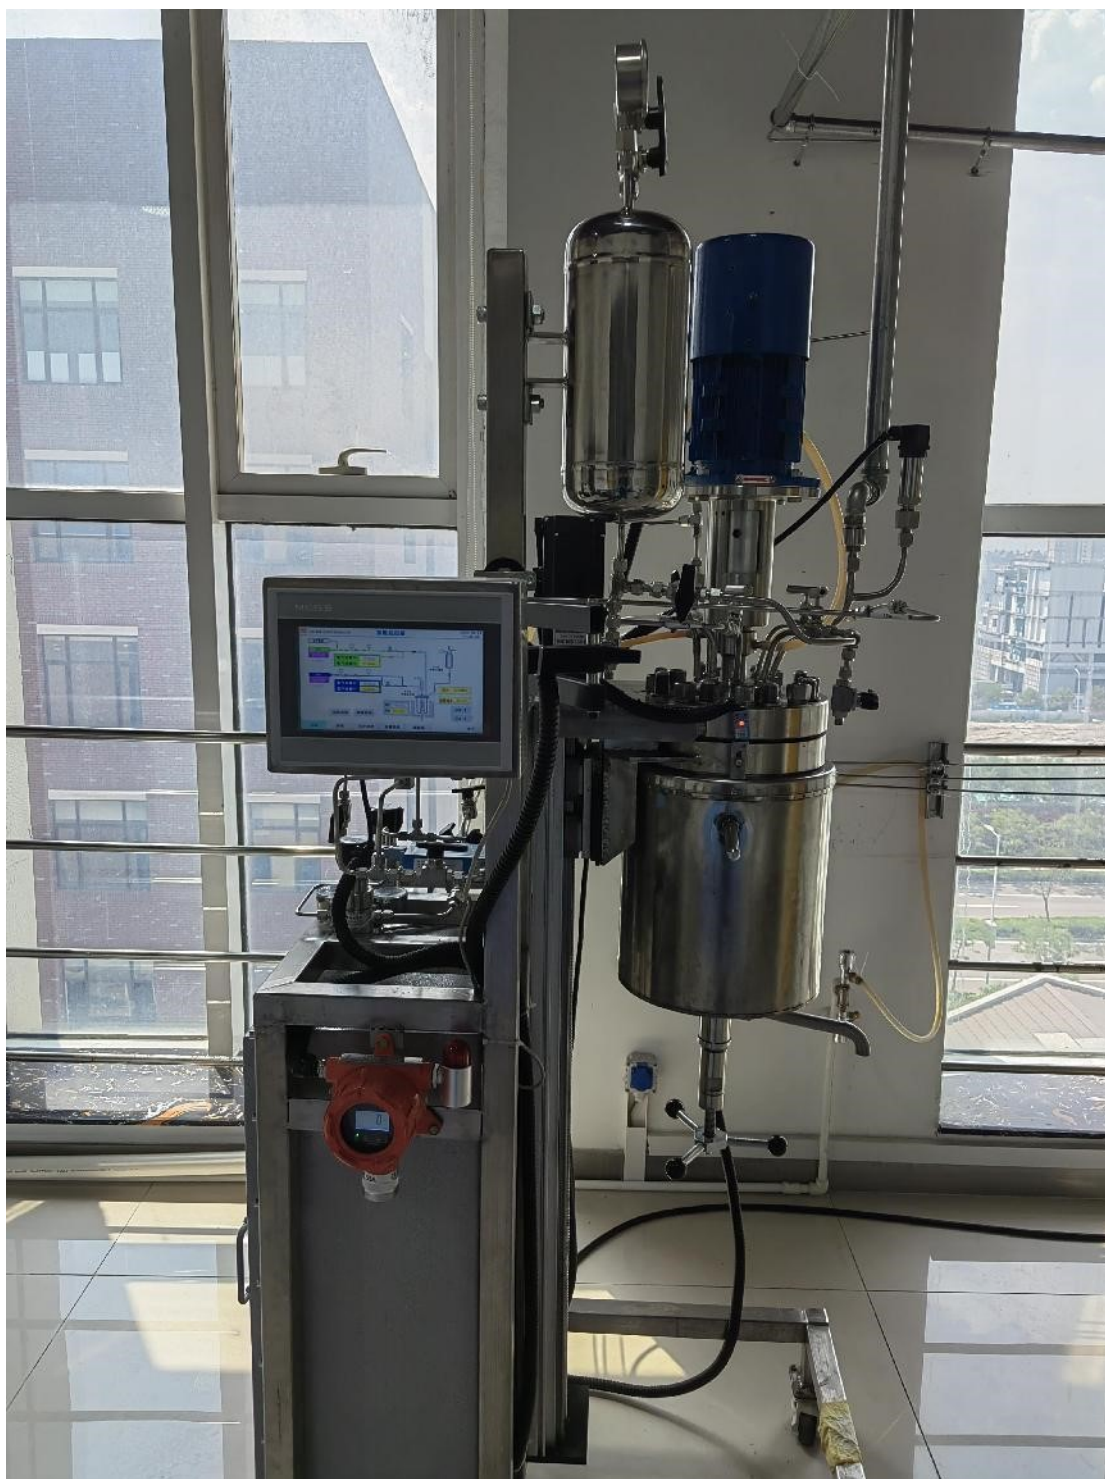

**Fig. S10** The batch reactor with a capacity of 3 L.
